# Supplementary material
Source: PubMed Central journal article supplement (PMC2259236)
Supplement: 216_2007_1577_MOESM1_ESM.pdf [file 216_2007_1577_MOESM1_ESM.pdf]

Electronic Supplementary Material

Analytical and Bioanalytical Chemistry

**High-precision frequency measurements: indispensable tools at the core of the molecular-level analysis of complex systems**

N. Hertkorn, C. Ruecker, M. Meringer, R. Gugisch, M. Frommberger, E. M. Perdue, M. Witt and P. Schmitt-Kopplin

The authors have provided high resolution images of the figures of this article. They are available as supplementary material to authorized users.

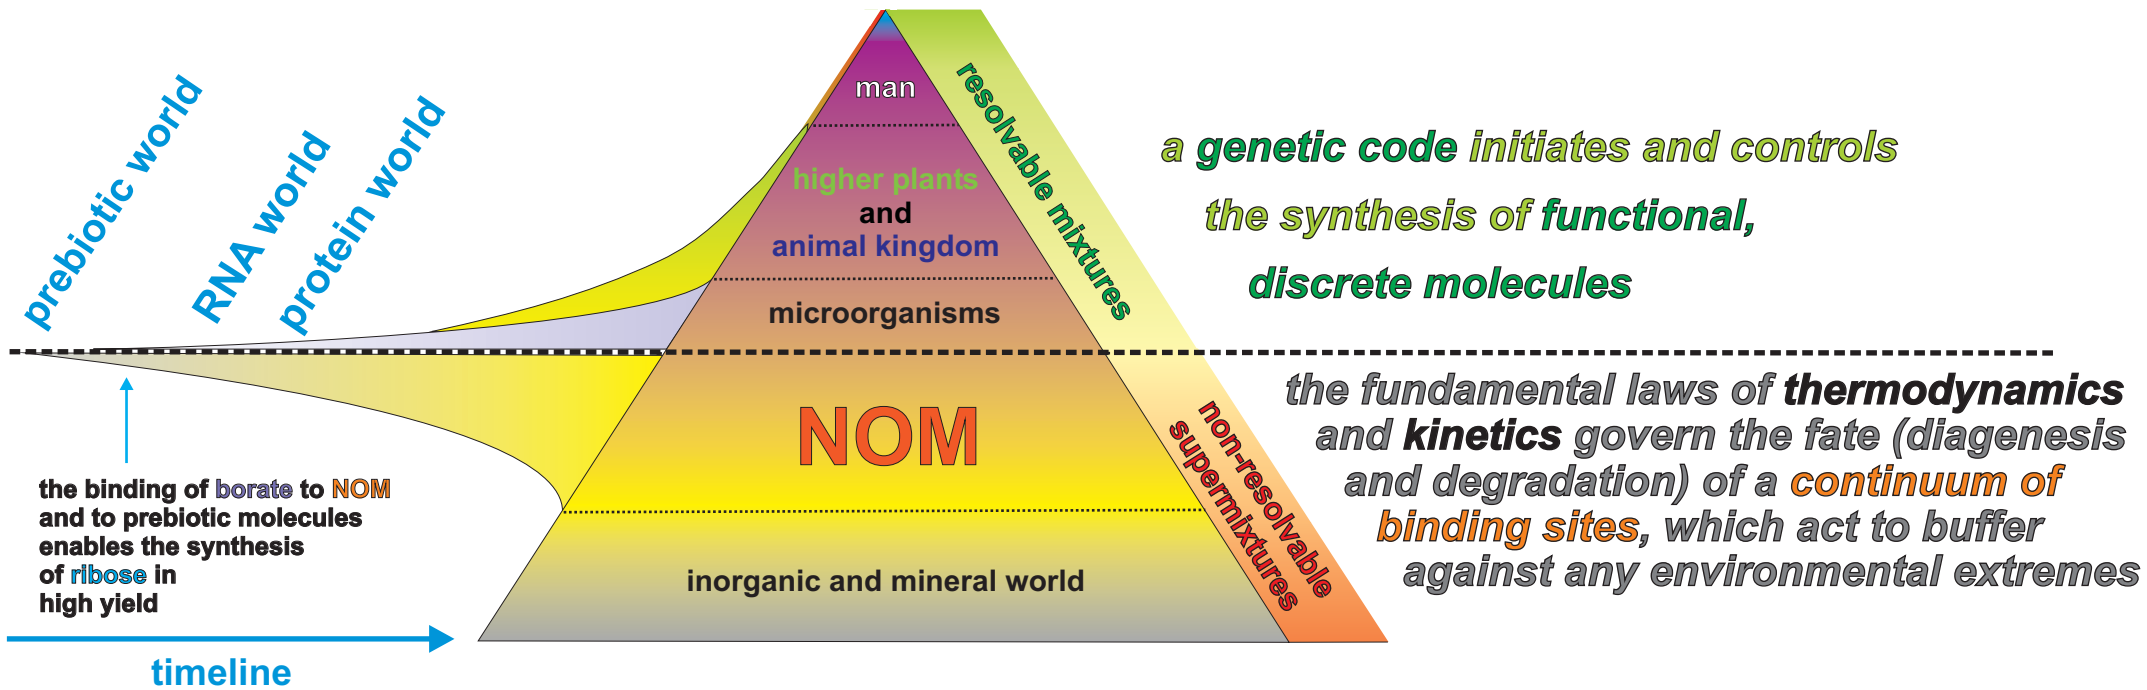

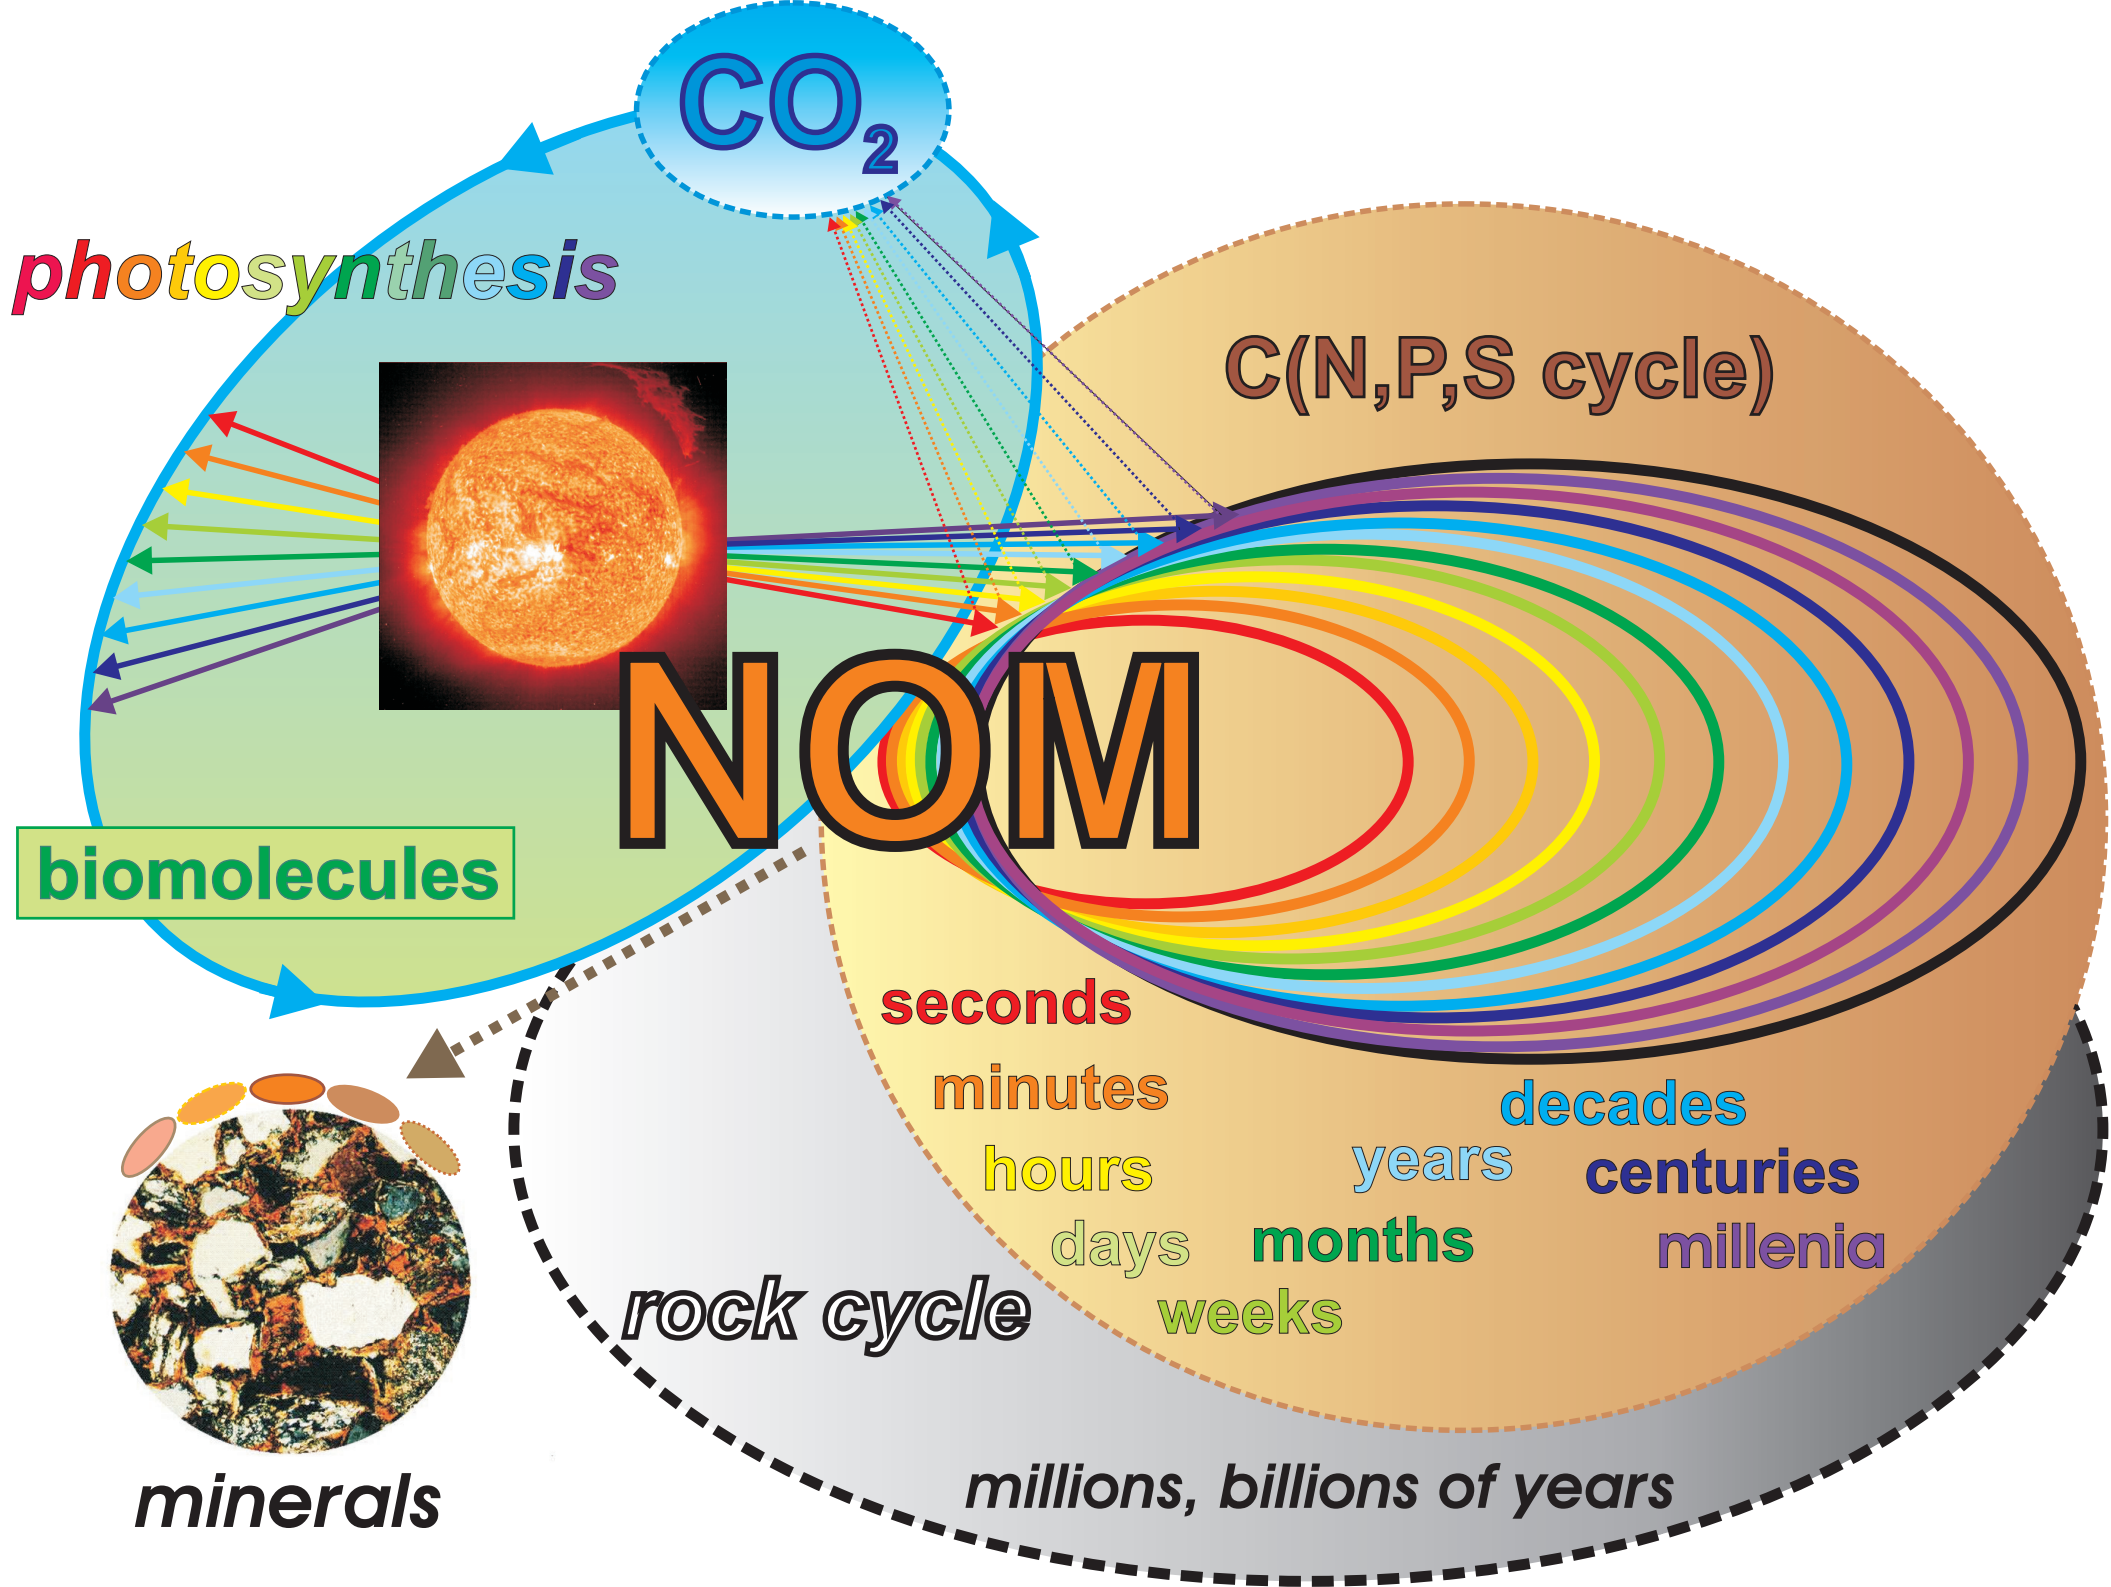

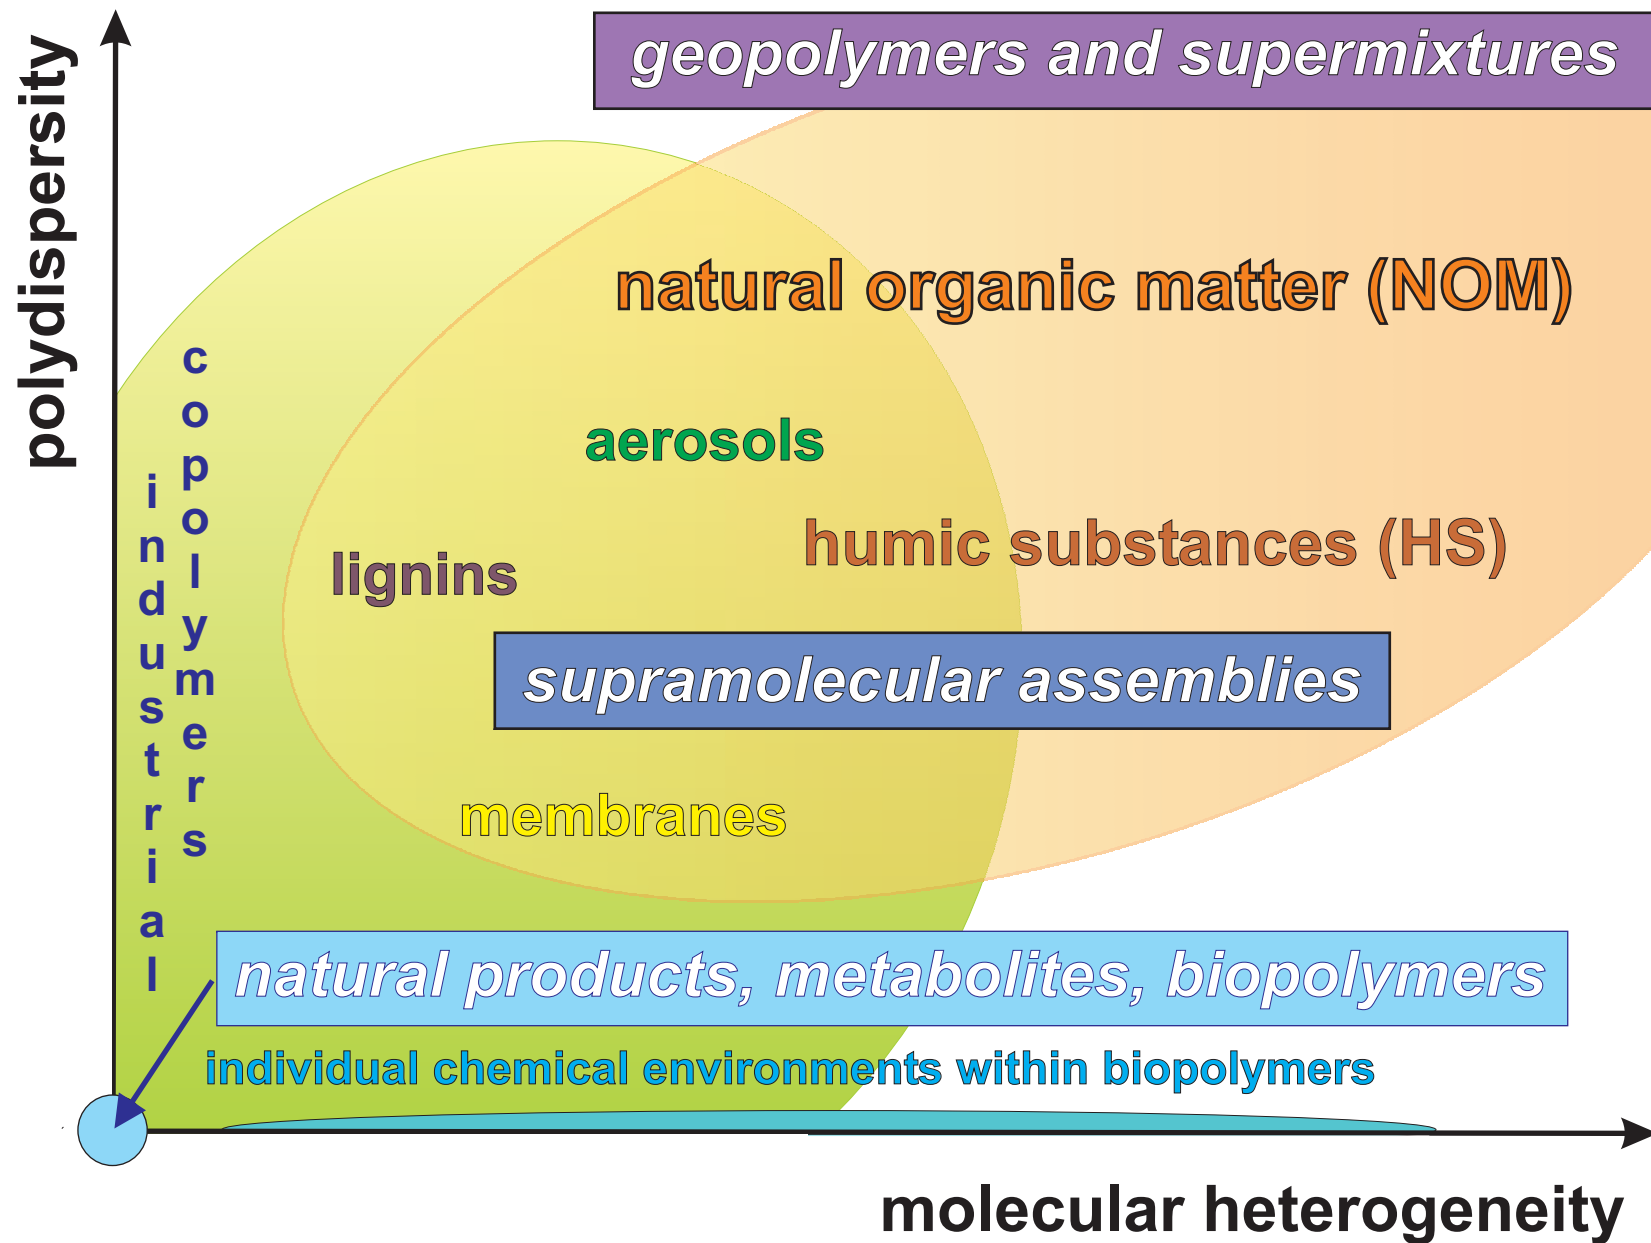



**A****B****C****D****a**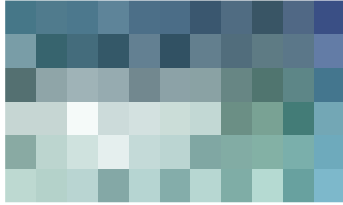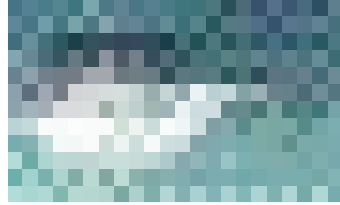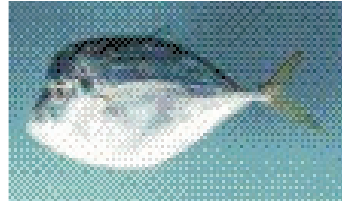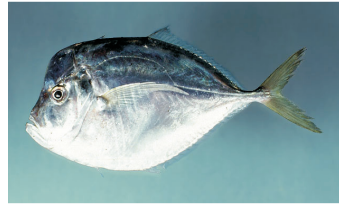**b**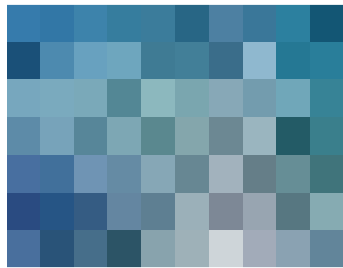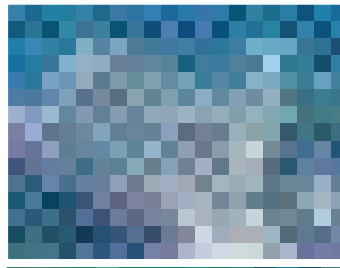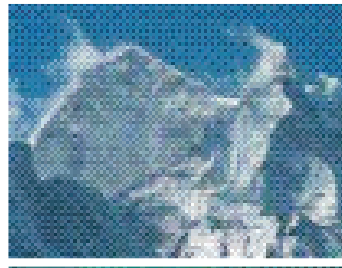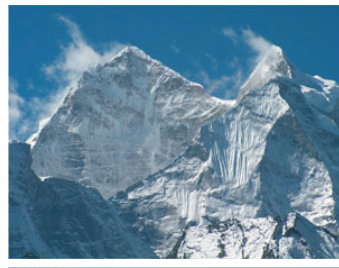**c**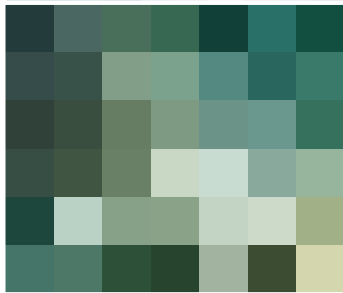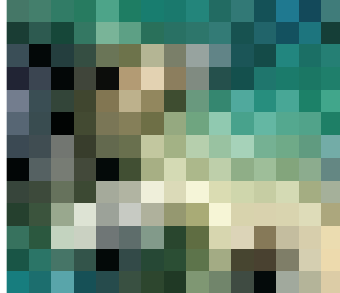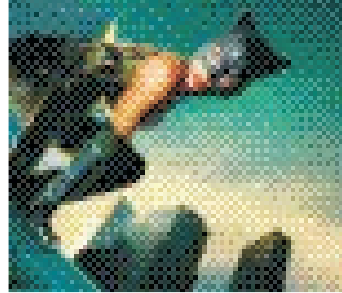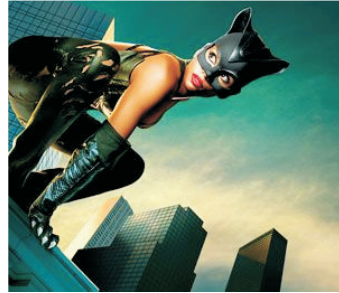**d**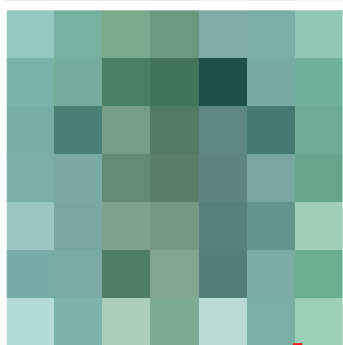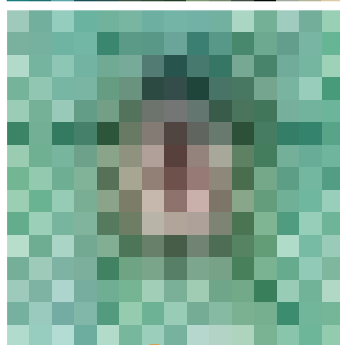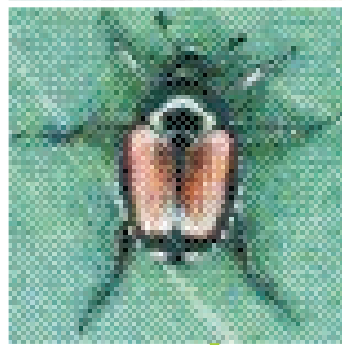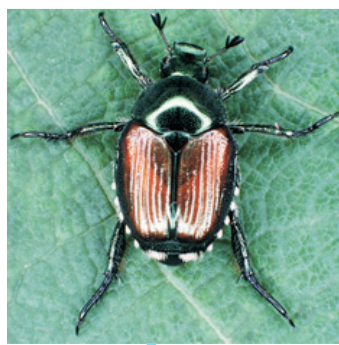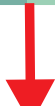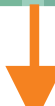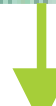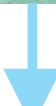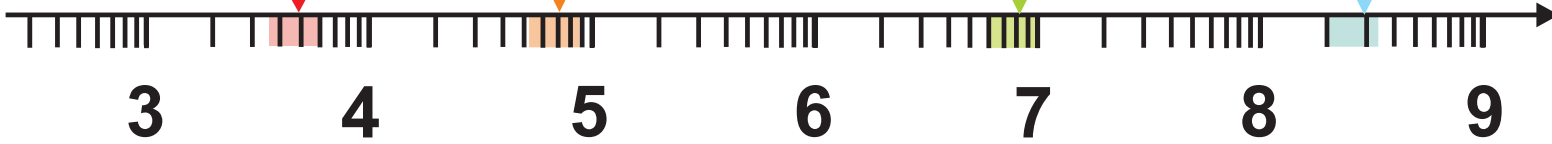 $\log n$

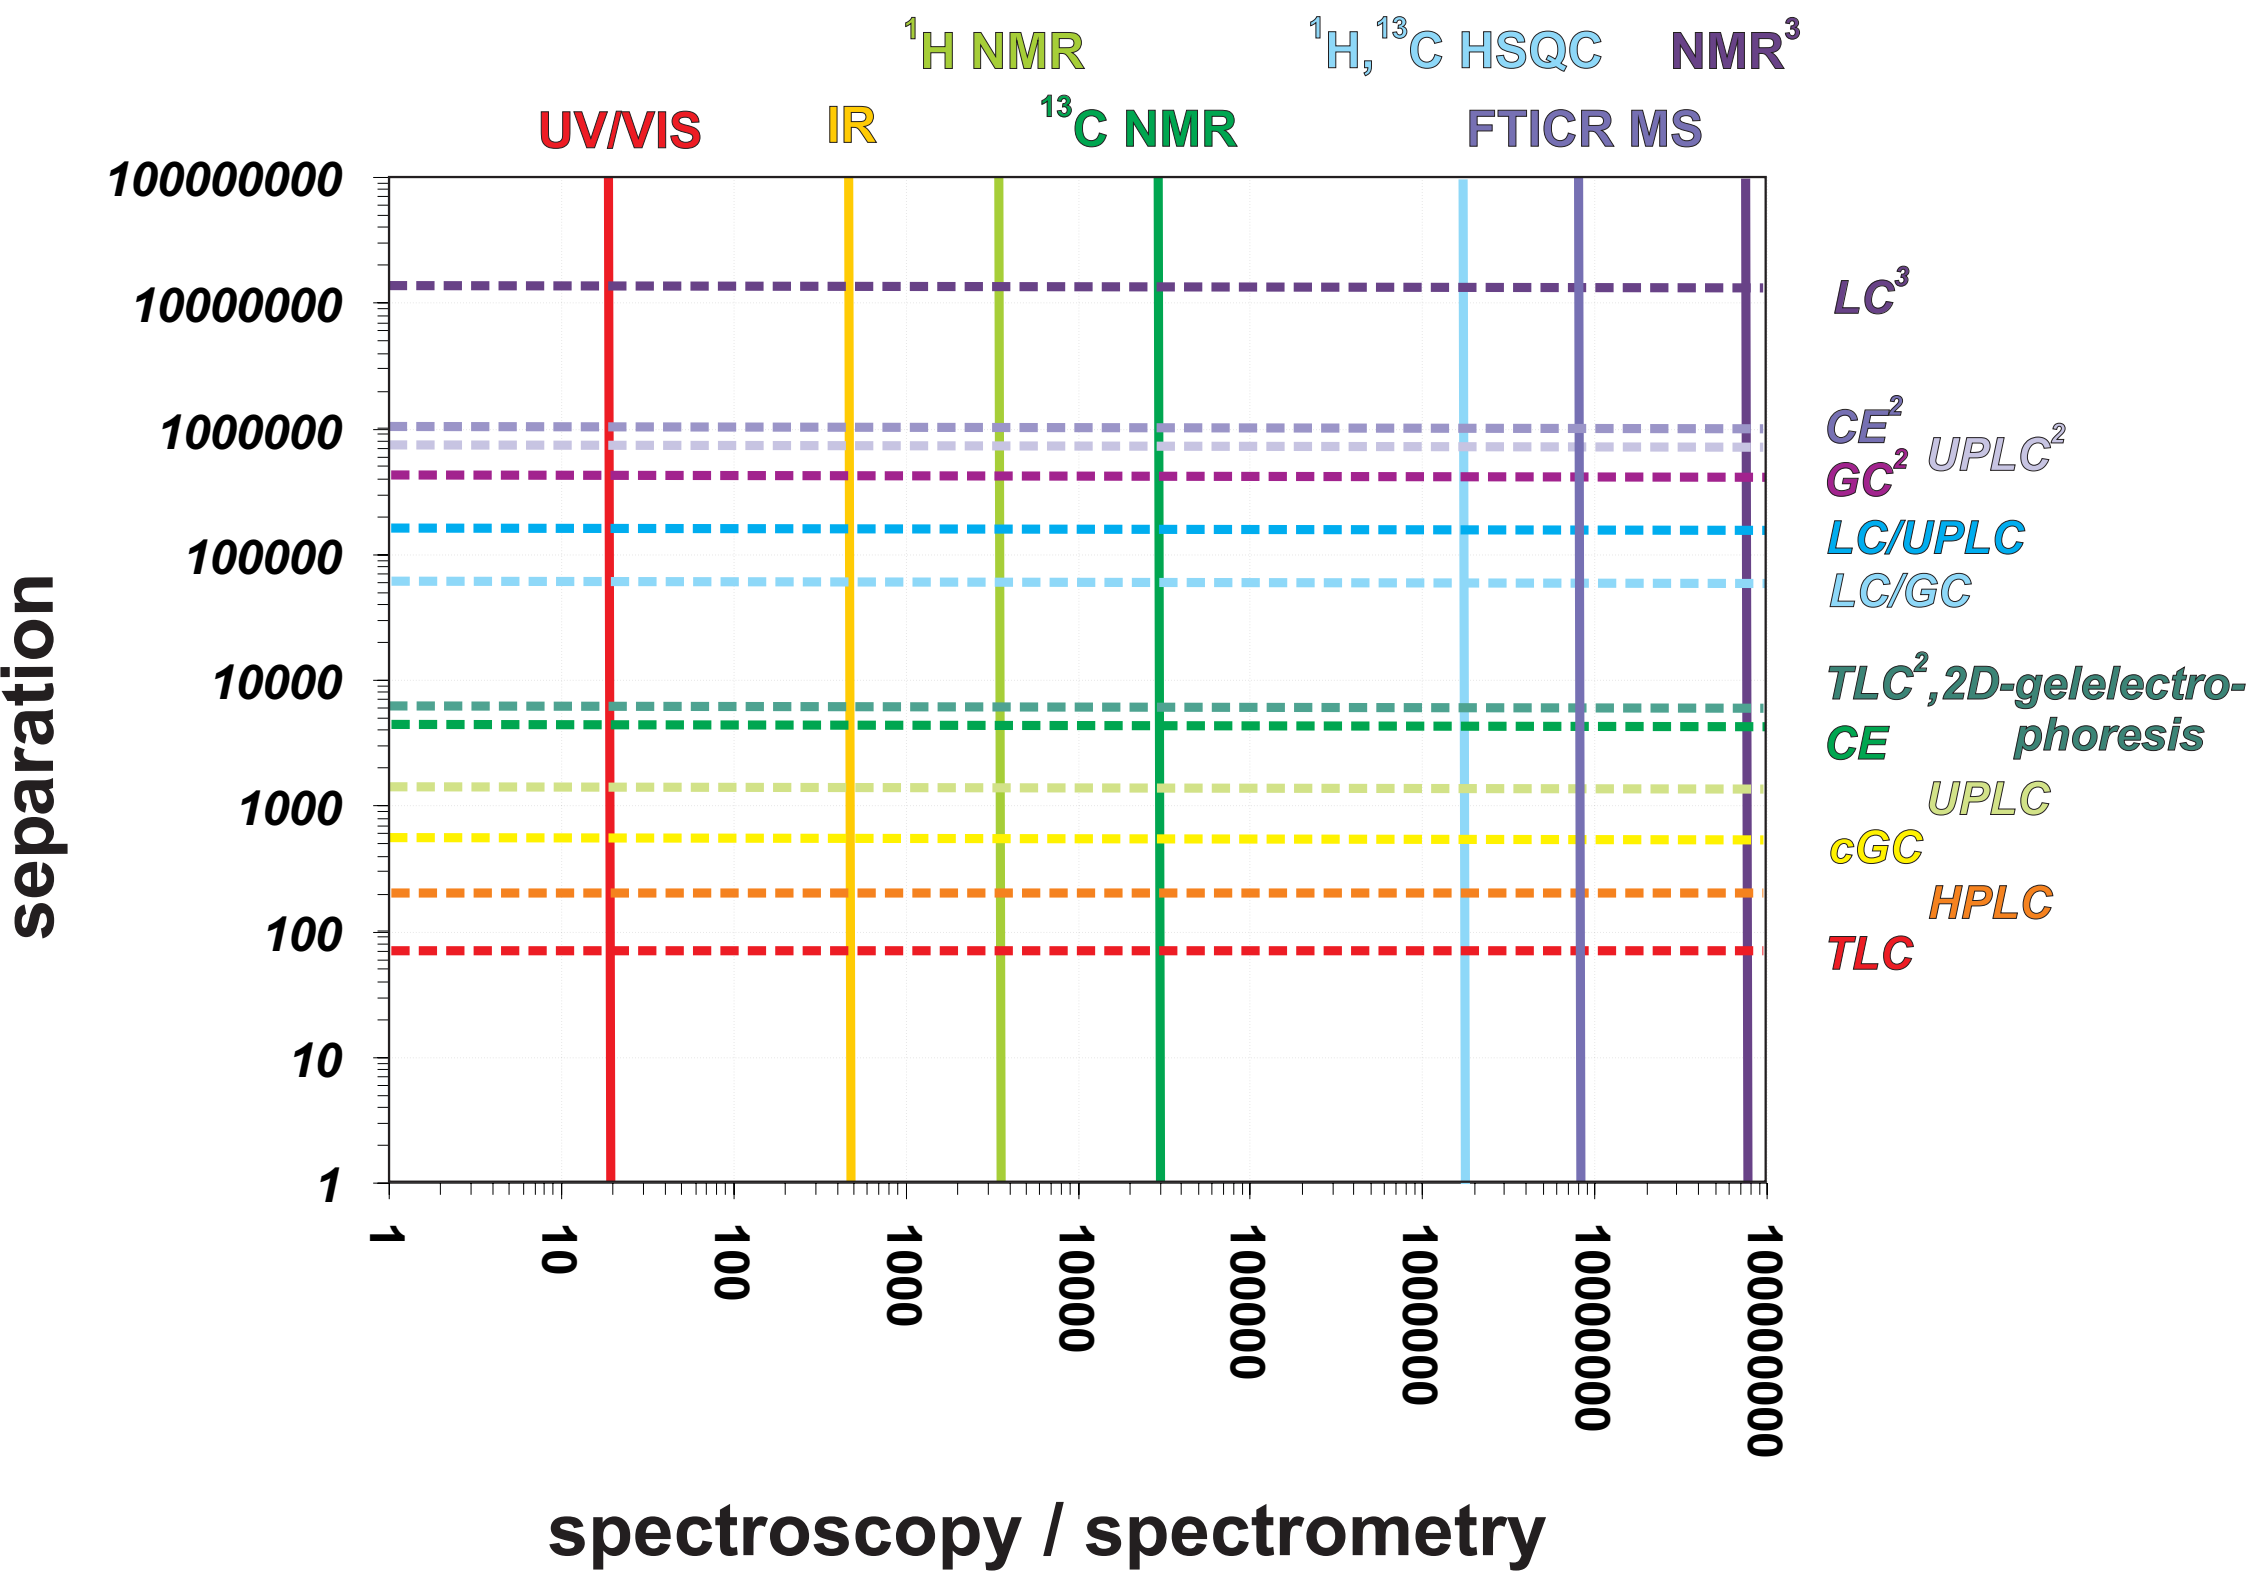

$$\Delta E = h \Delta \nu$$

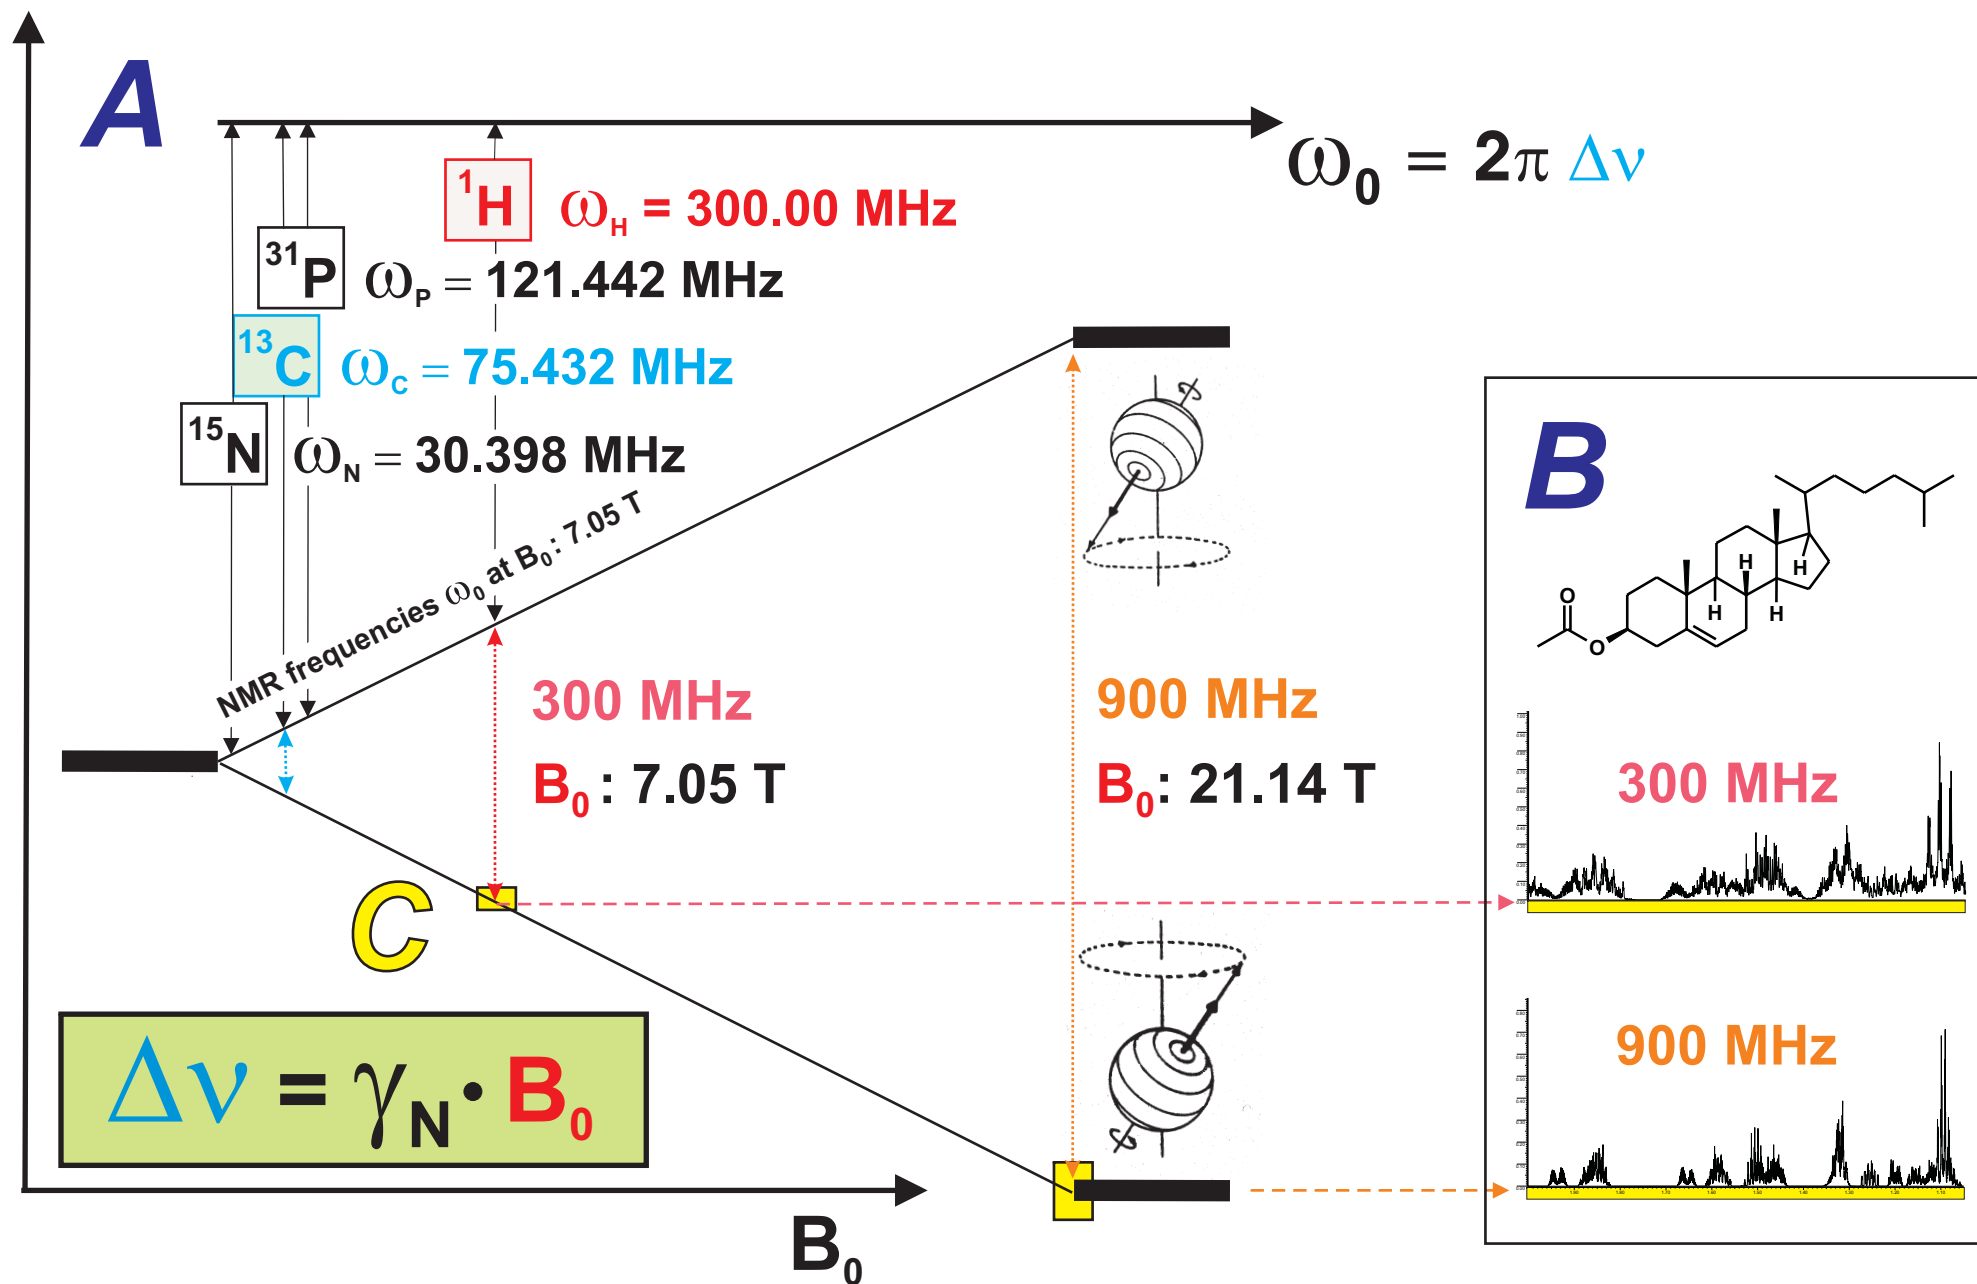

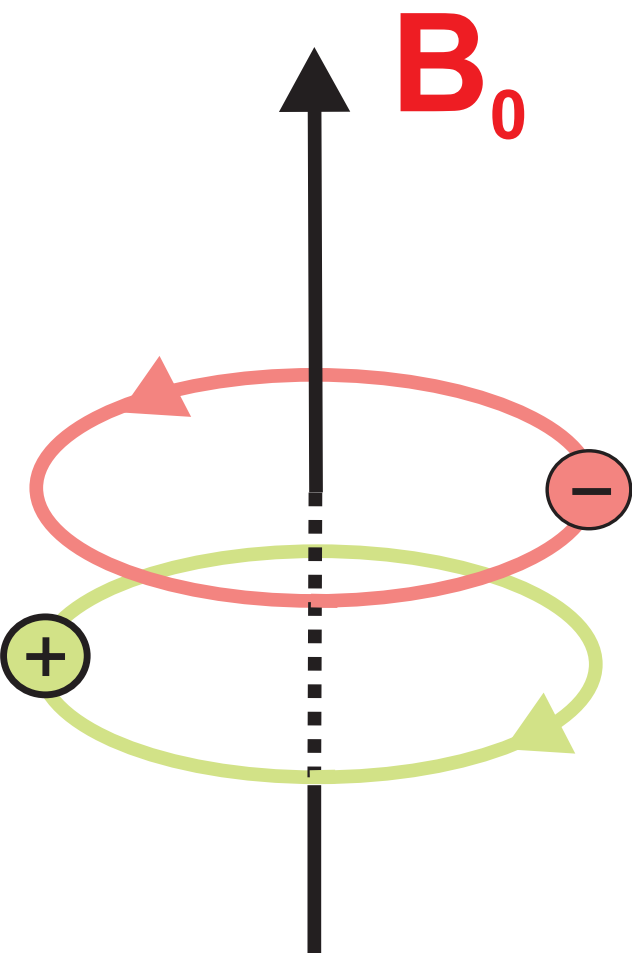

$$\omega_c = q \cdot B_0 / m$$

$$\omega_c = \frac{v_c}{2\pi} = \frac{1.535611 B_0 \cdot q}{m}$$

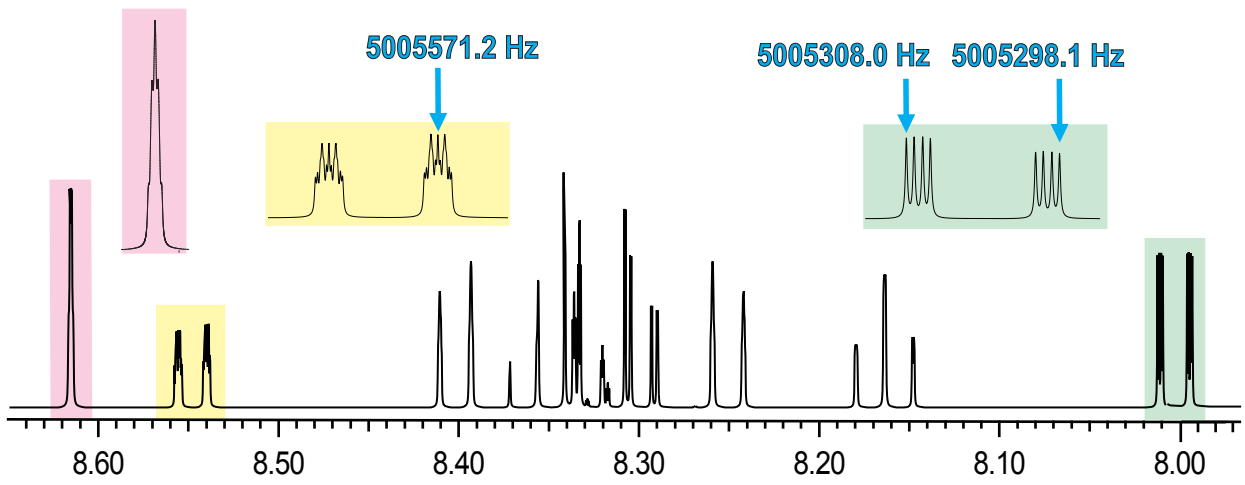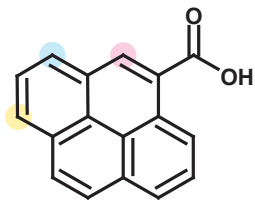

$\delta(^1\text{H})$  [ppm]

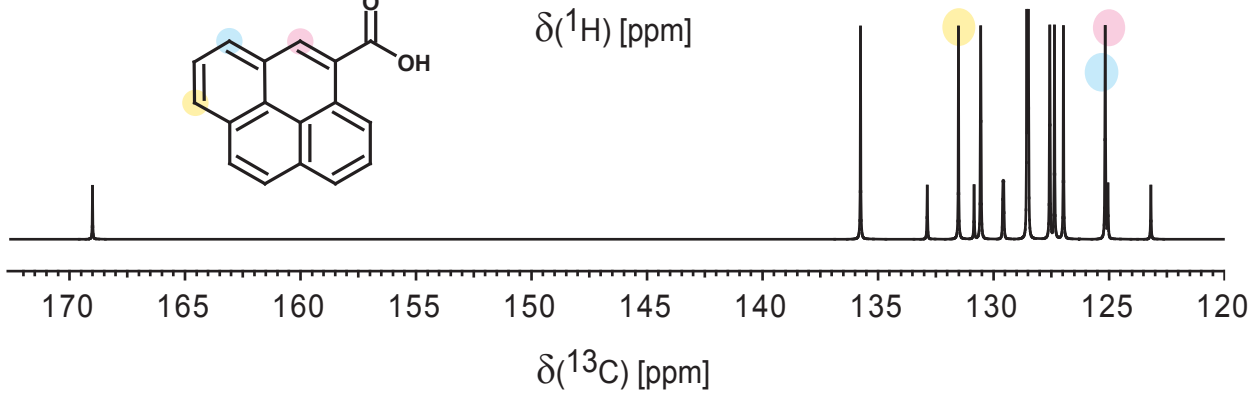

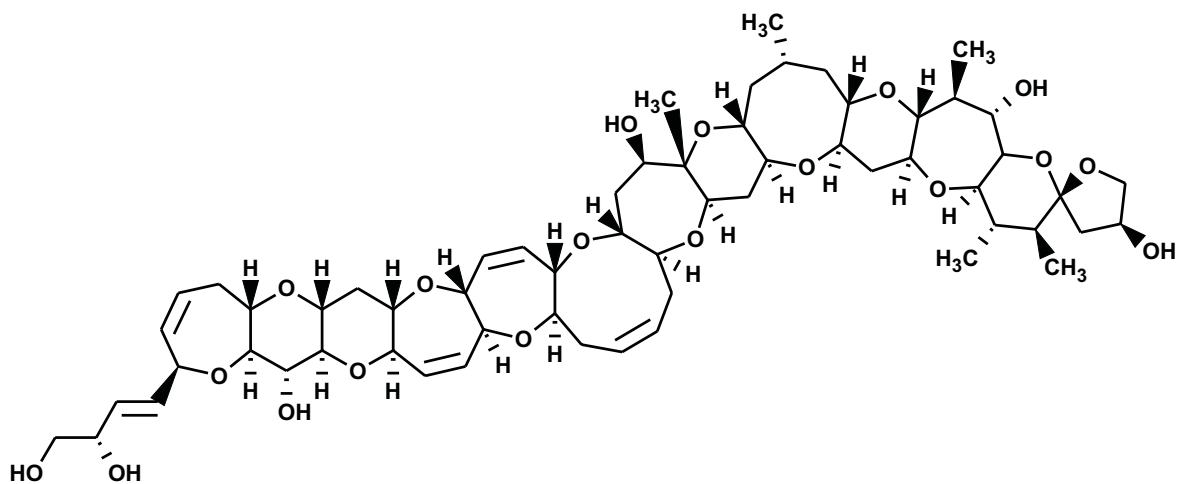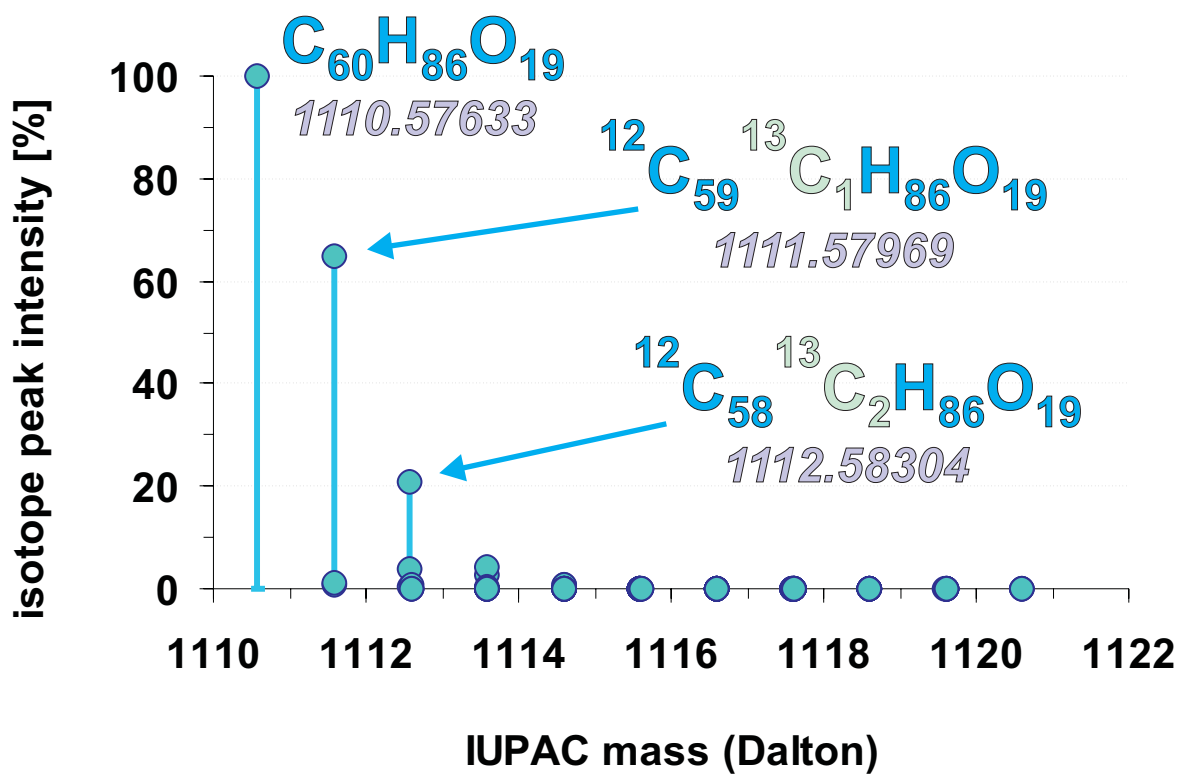

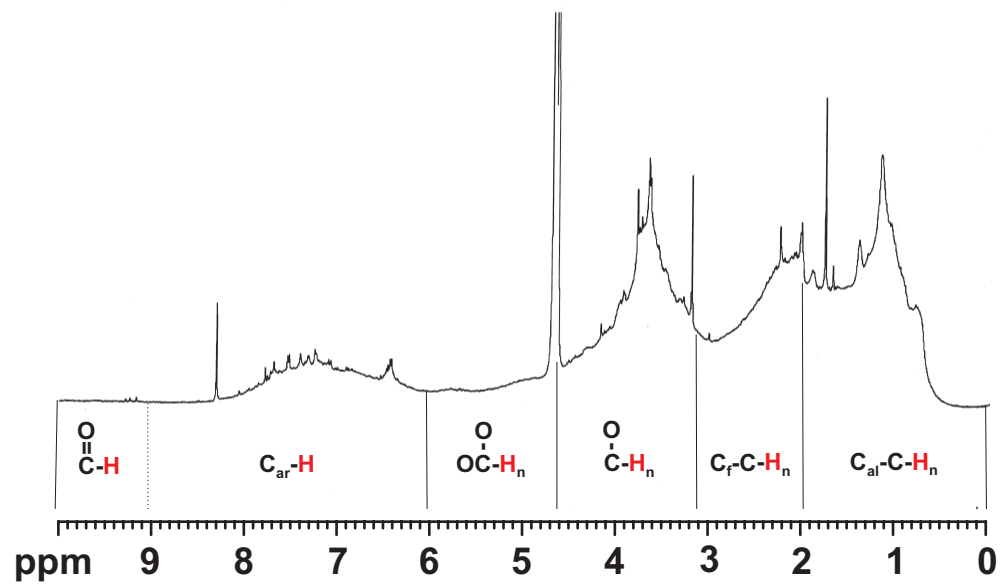

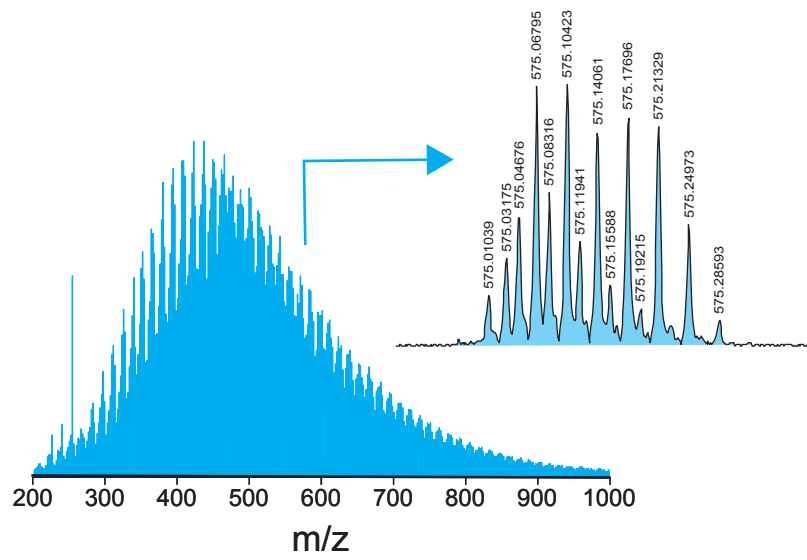



the total space of  
molecular structures

$10^{60-200}$

isotope-specific  
projection of  
molecular environments

isomer-filtered projection results in  
the compositional space

NMR

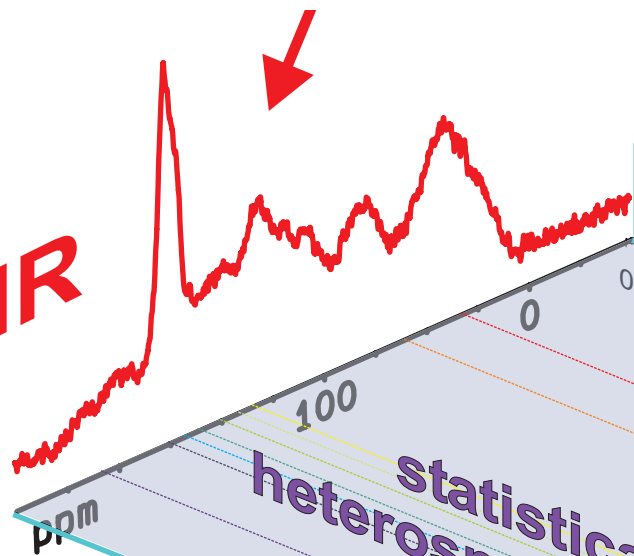

mass spectrometry

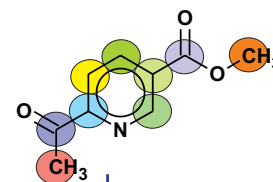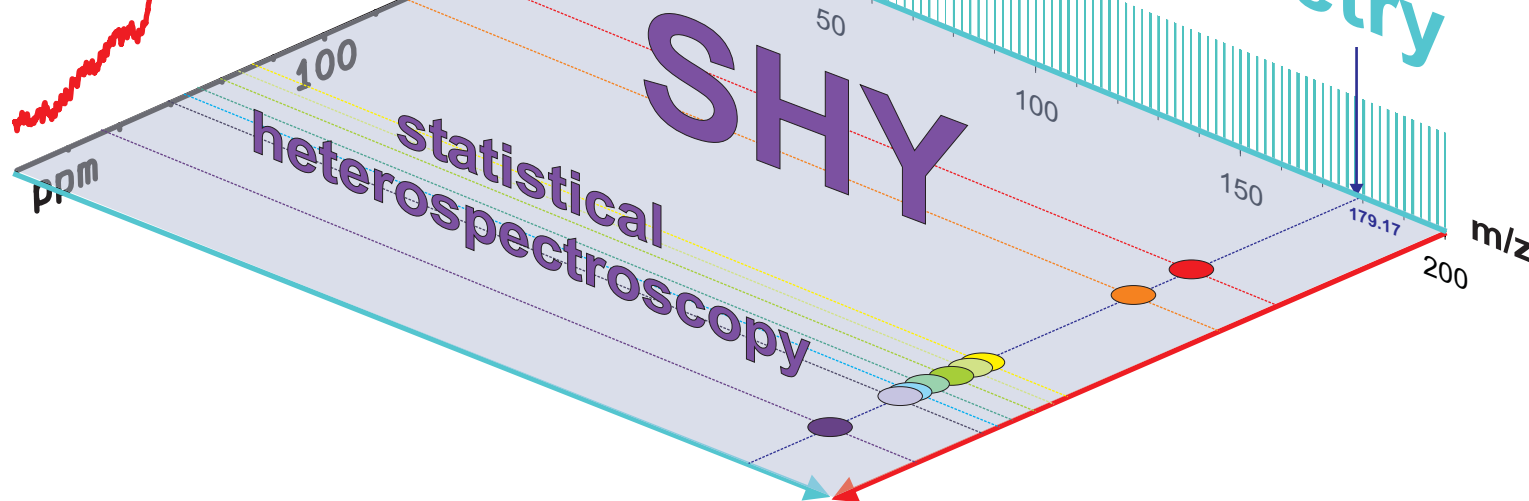

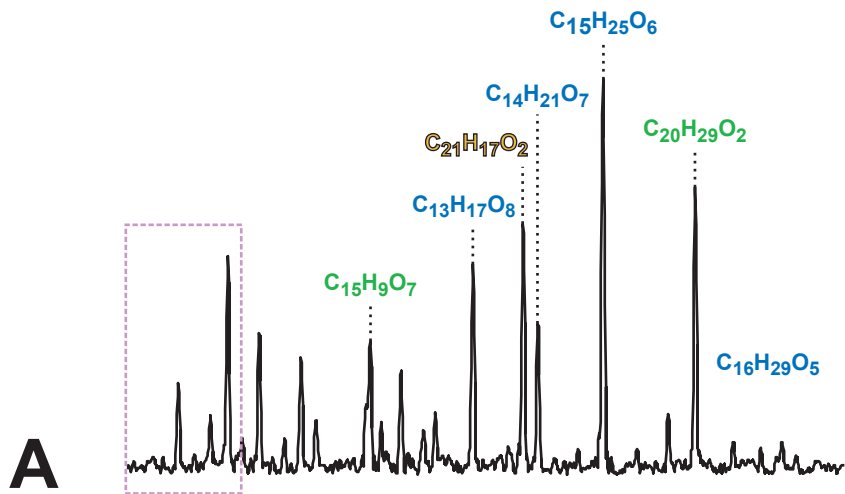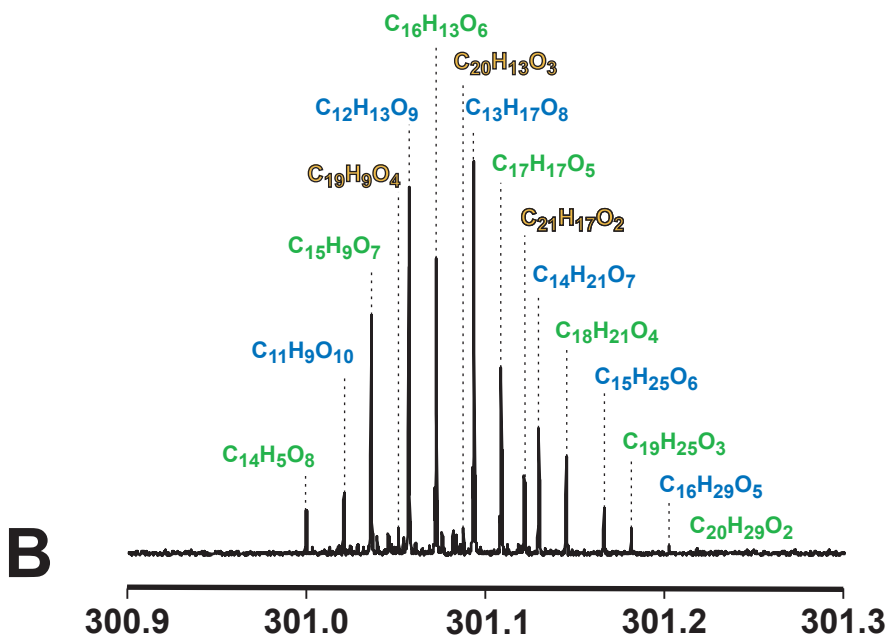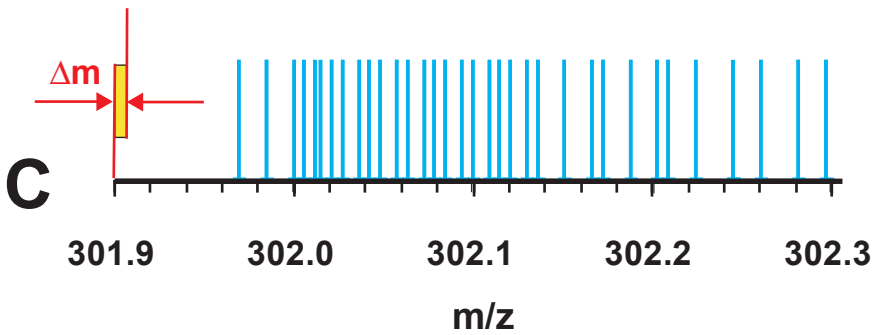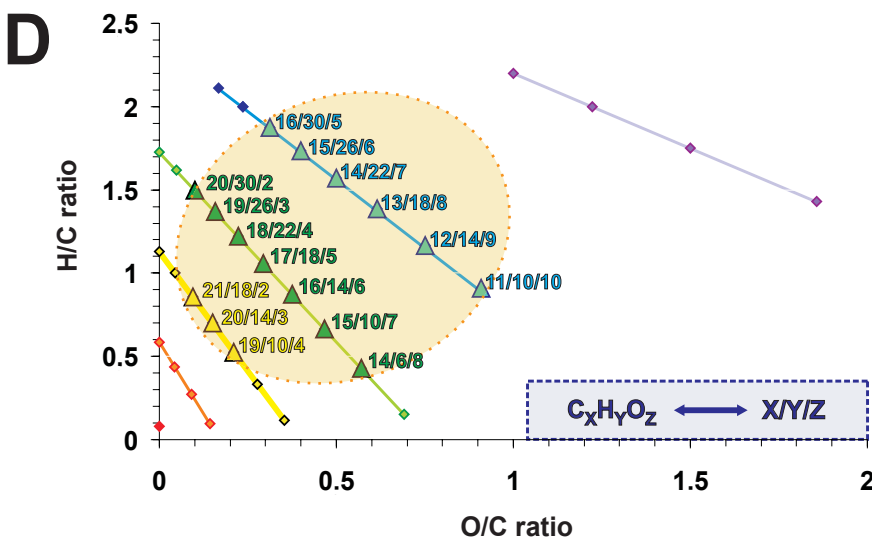

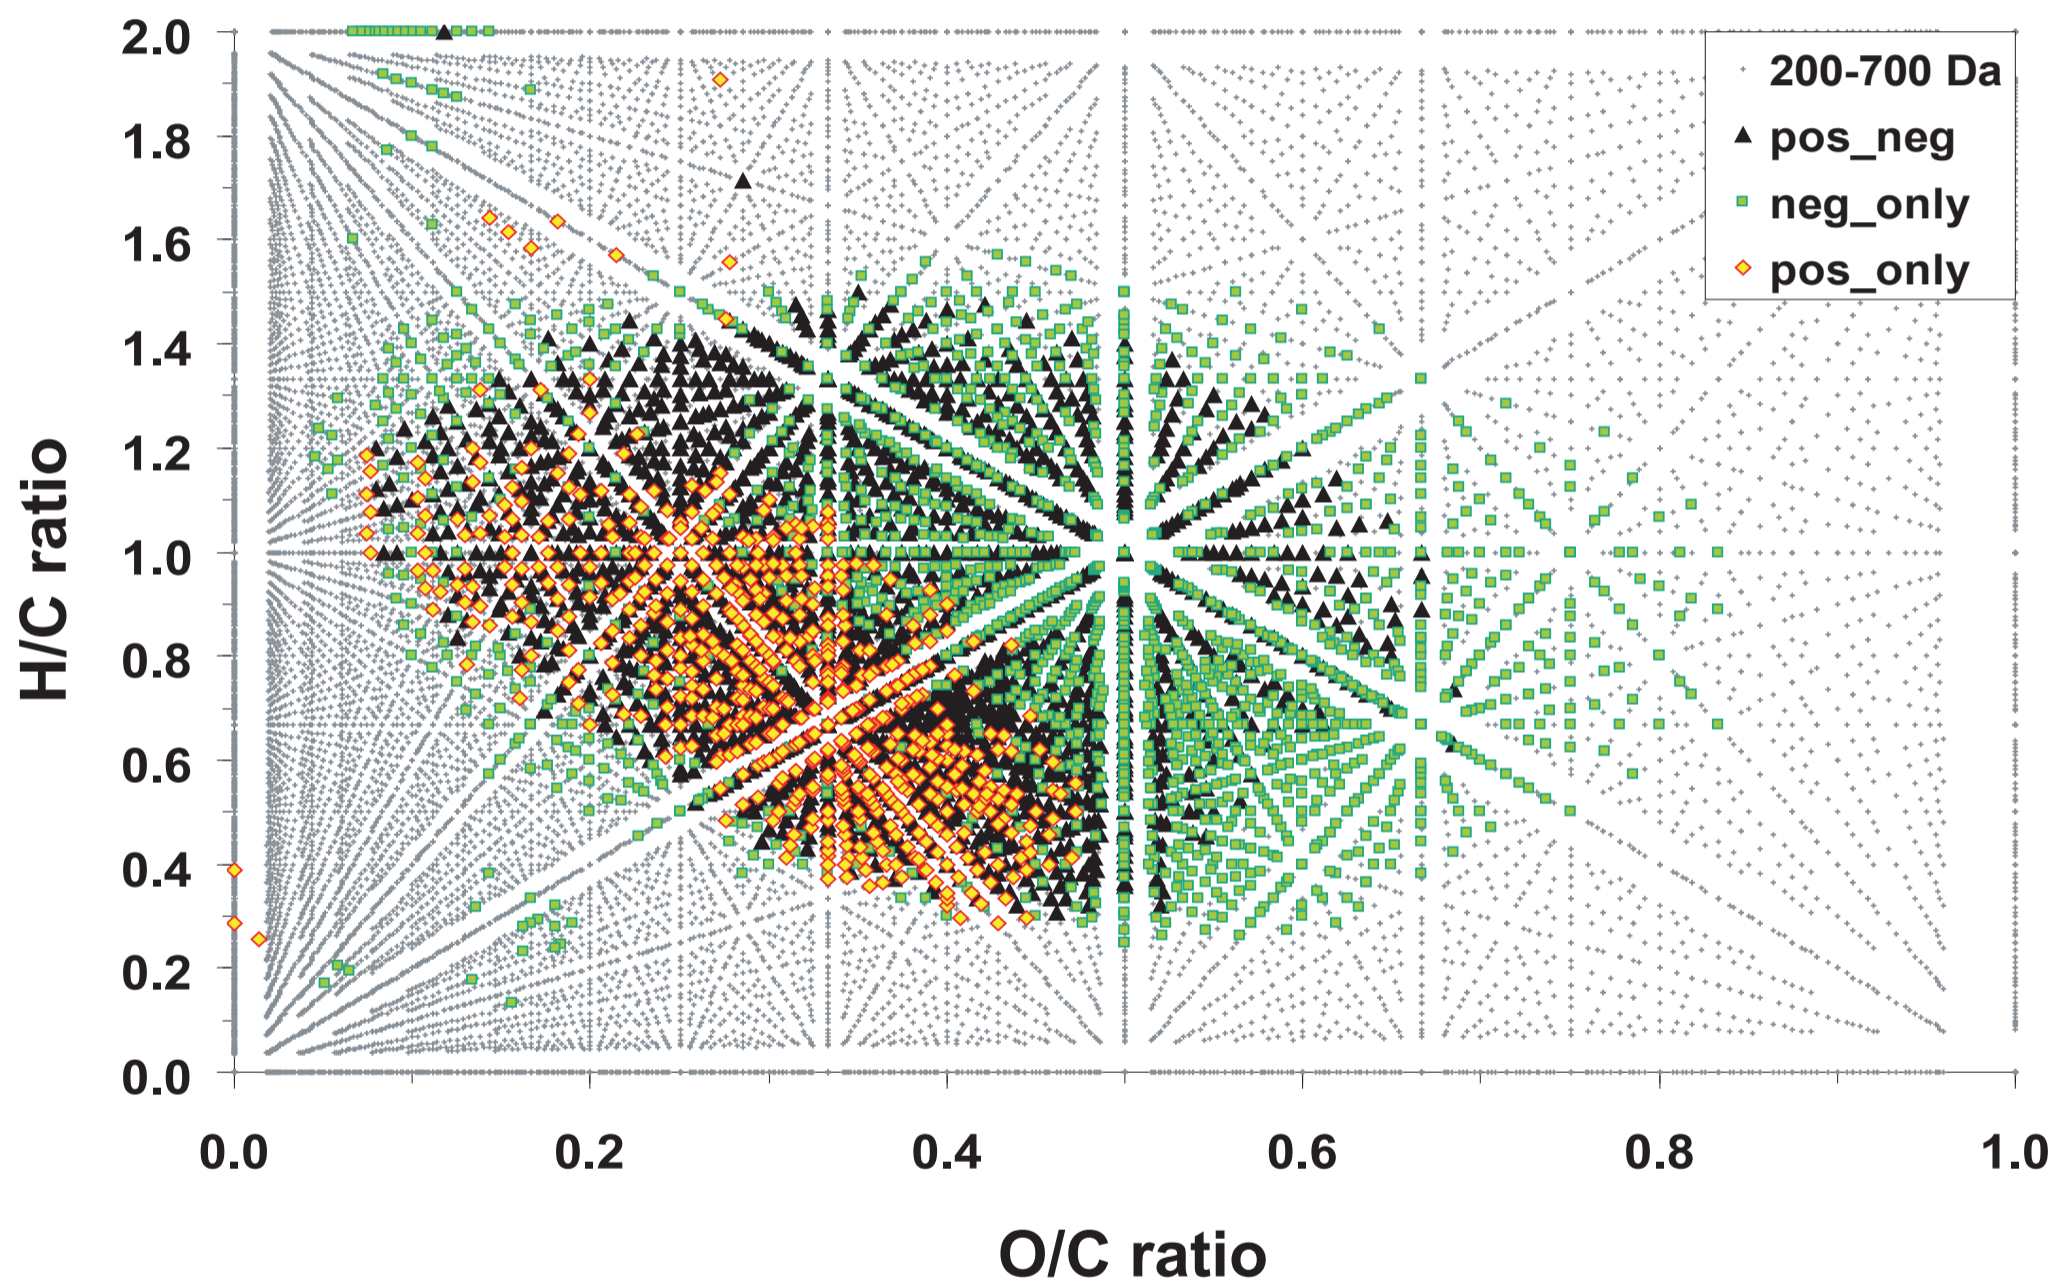

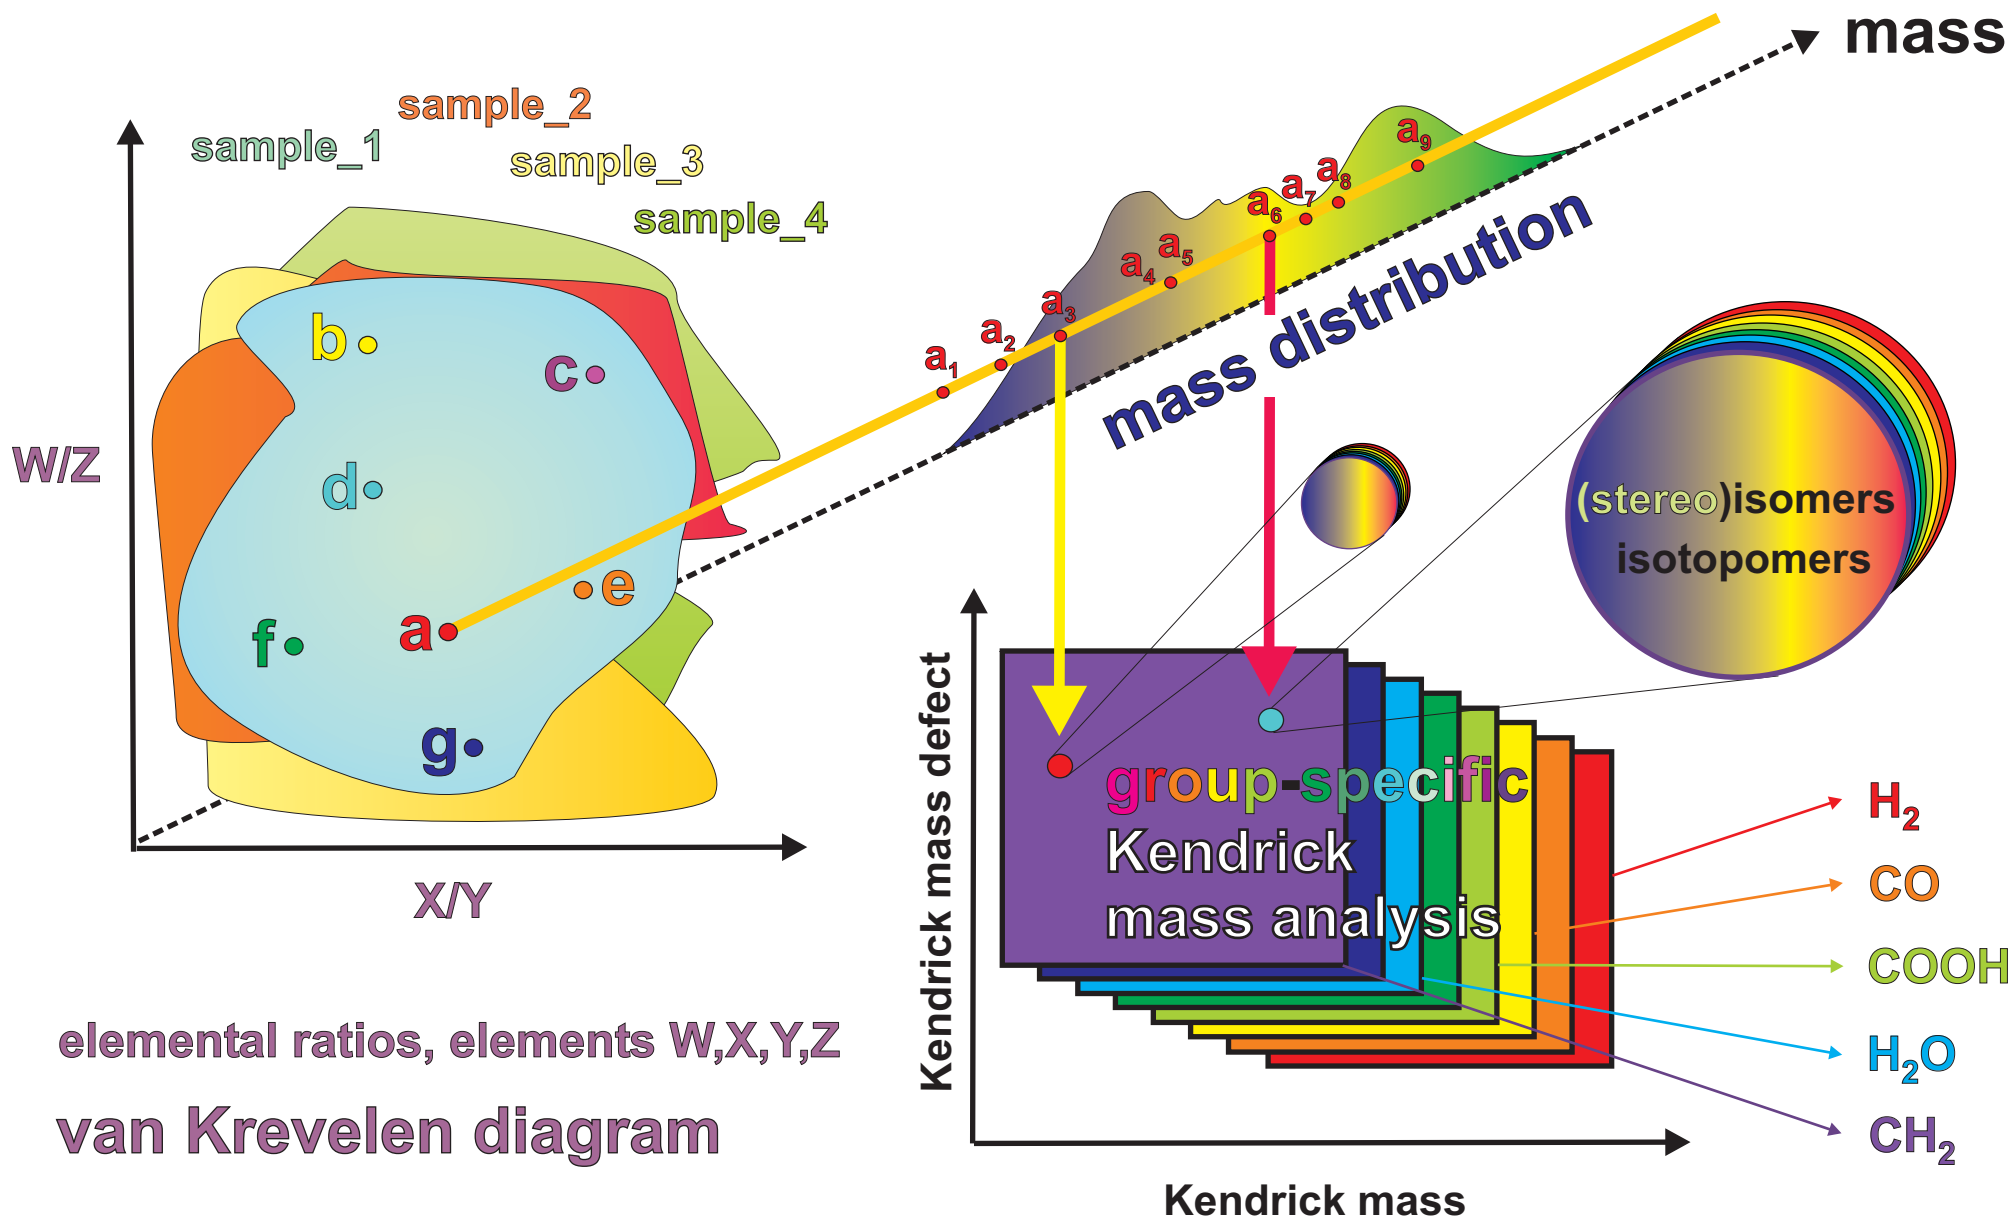

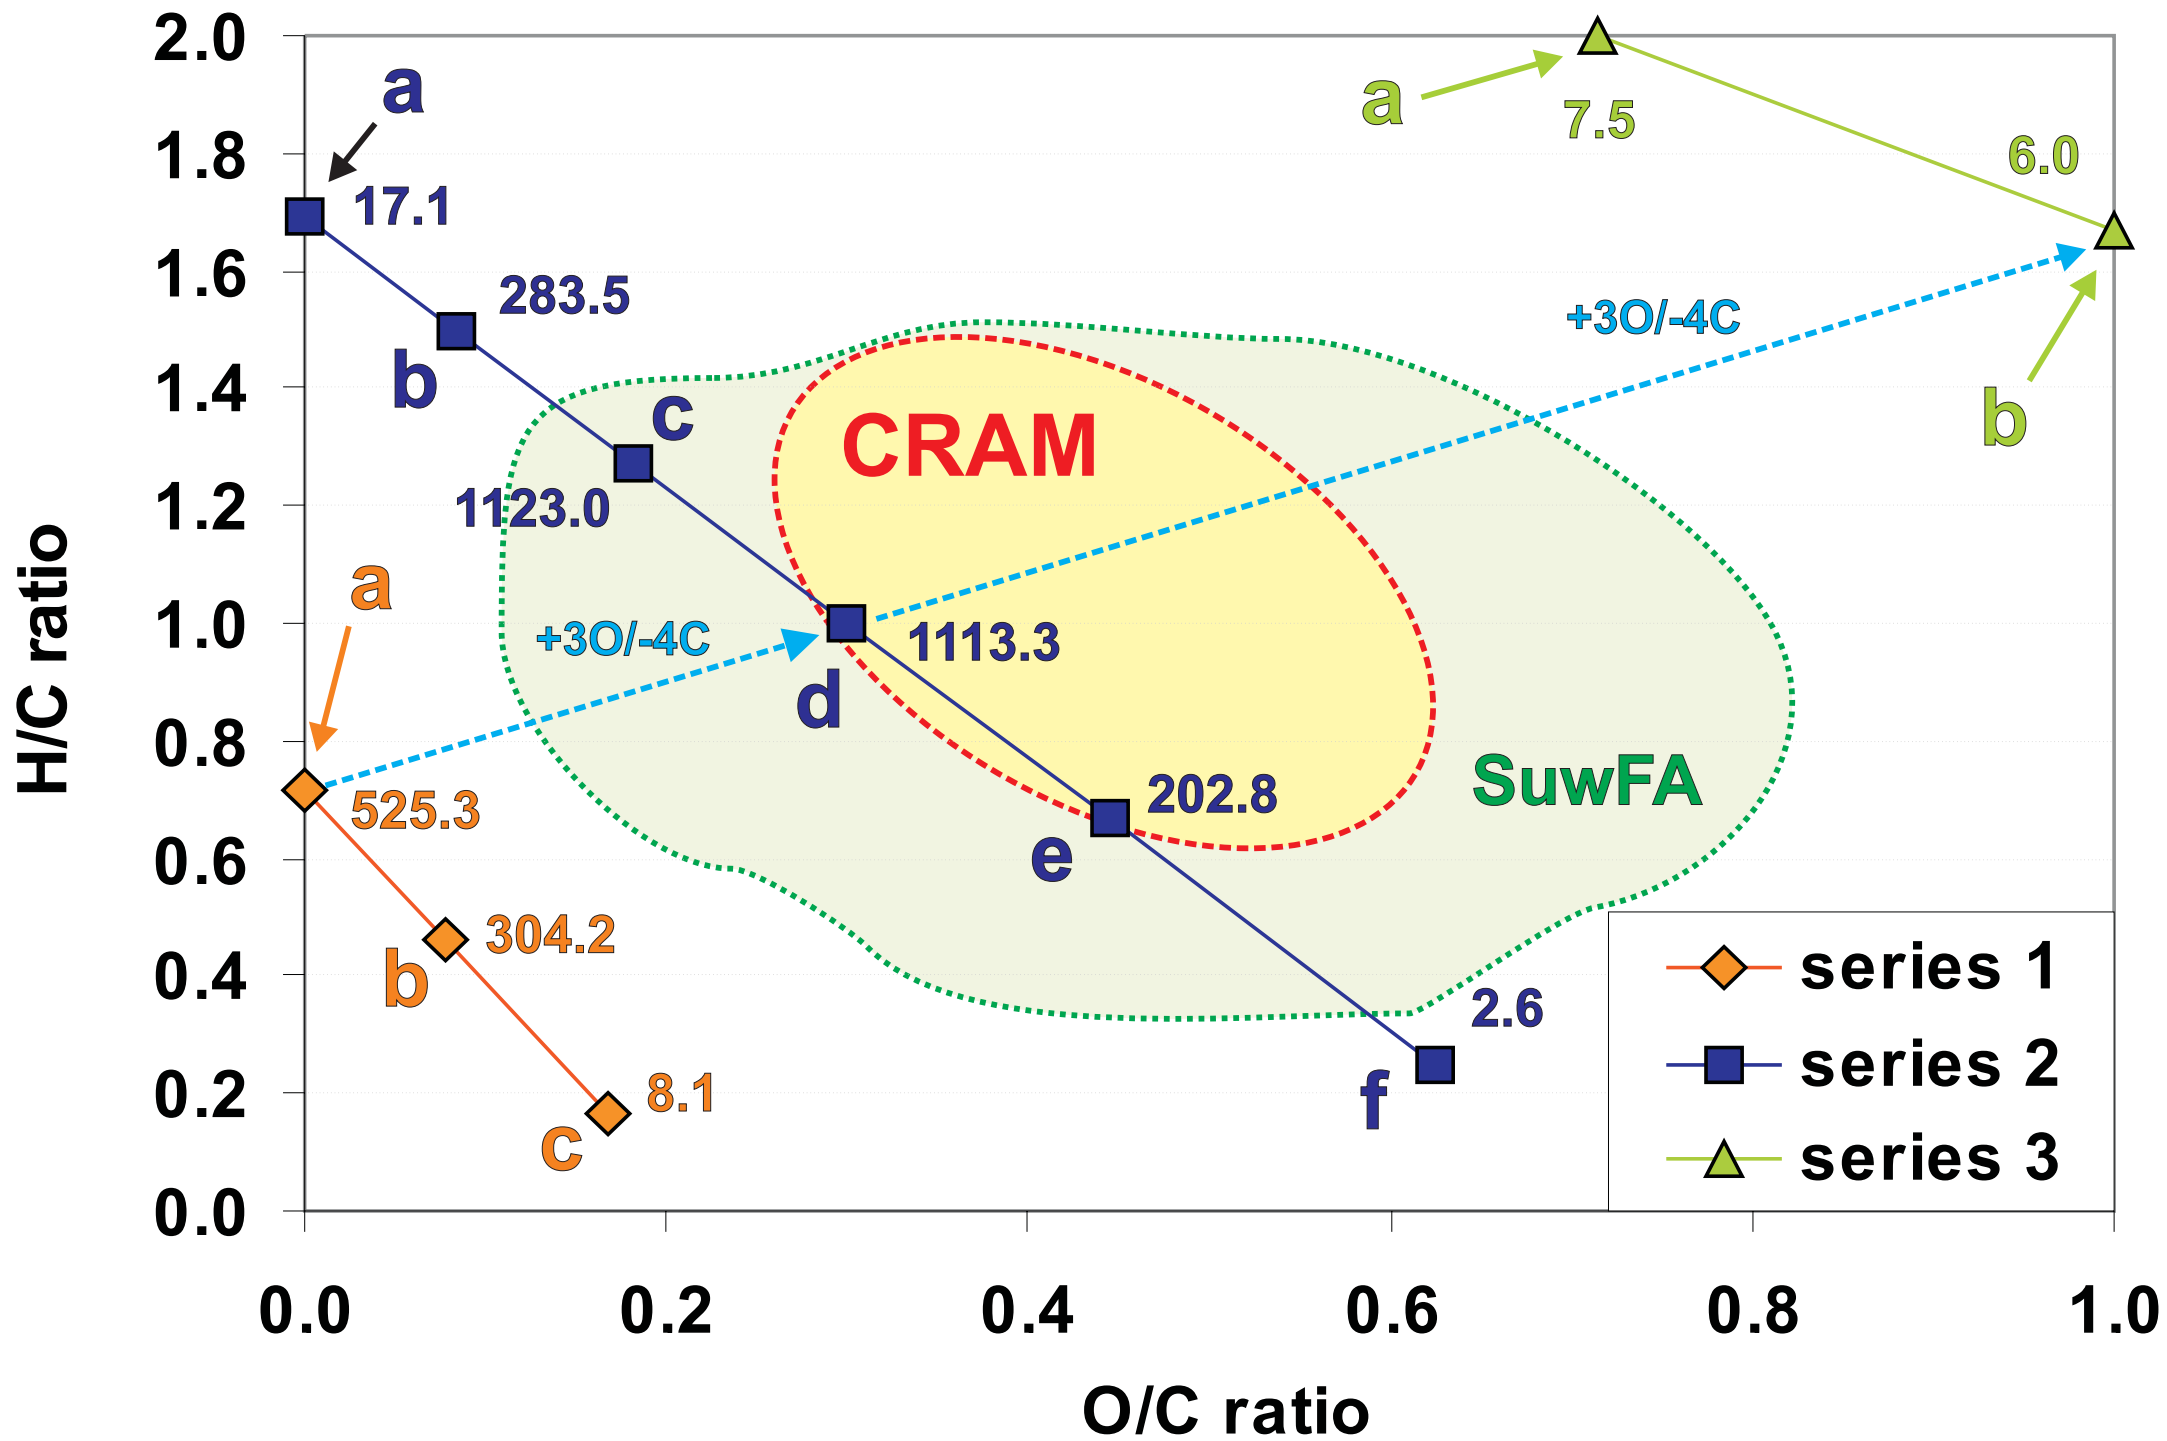

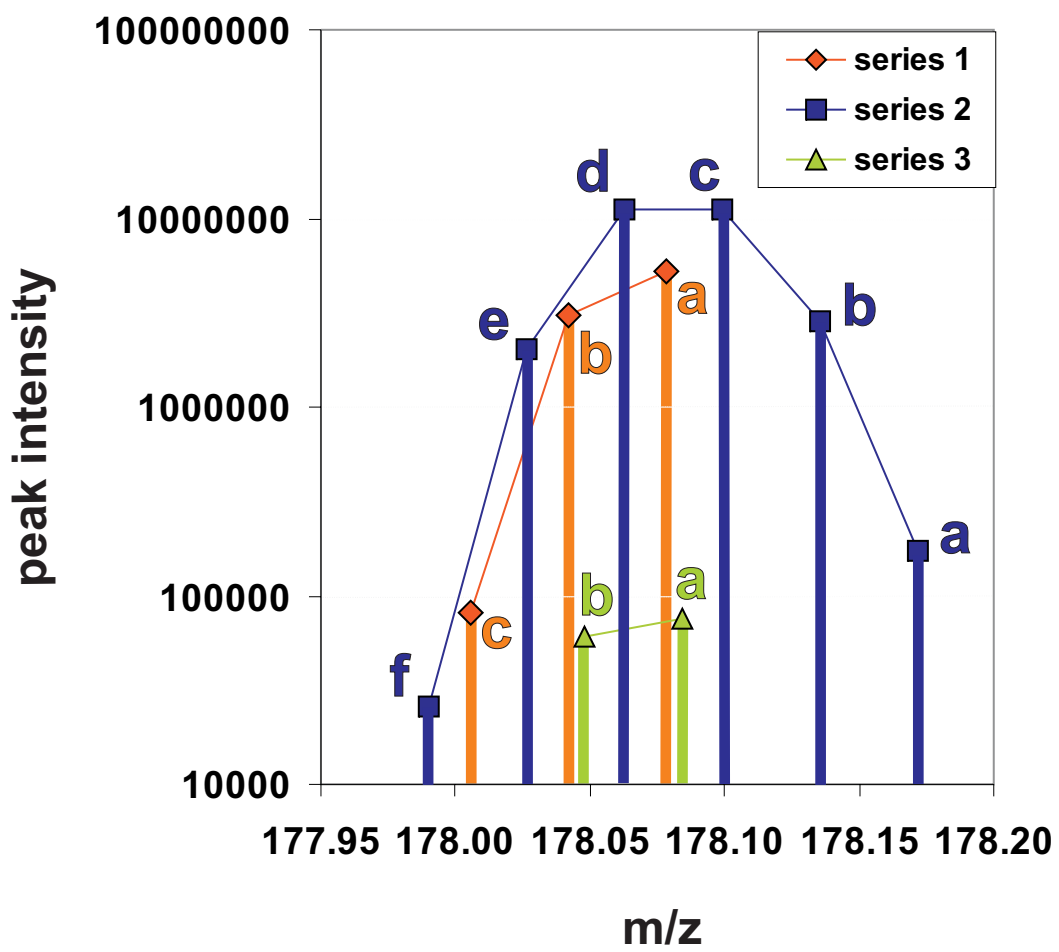

$10^{60-200}$

*structure space*

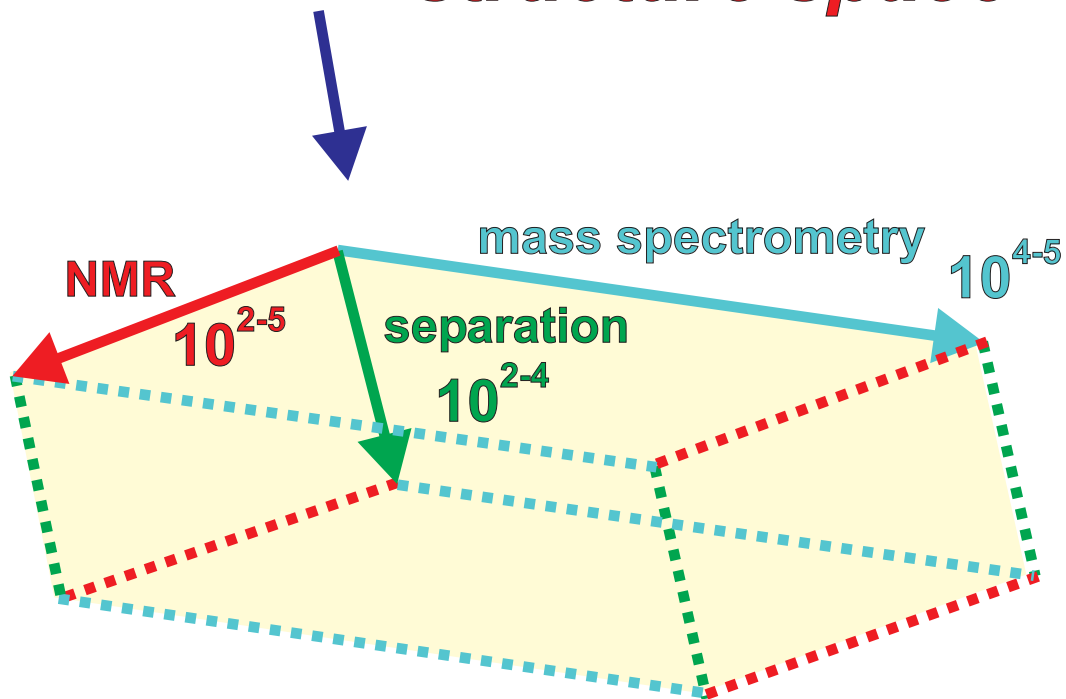

significant (analytical)

bucket space:  $10^{8-14}$

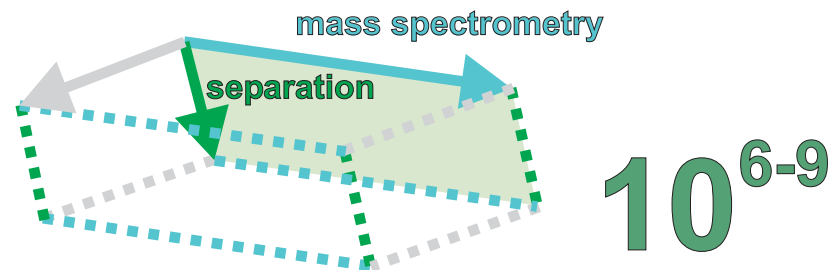

LC(CE) / MS

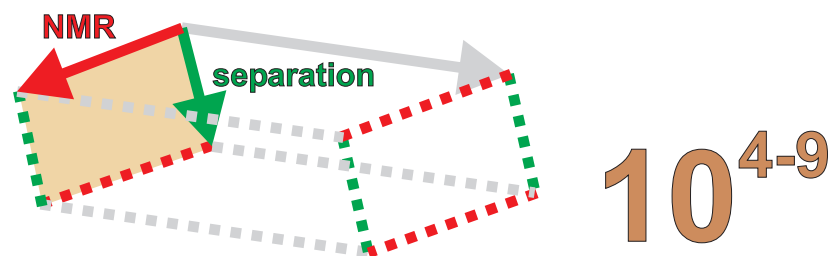

LC (CE) / NMR

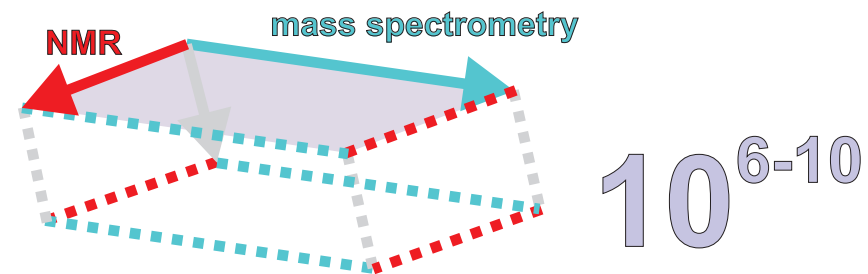

NMR / MS

statistical hetero-spectroscopy (SHY)
